# Supplementary material for: Reactivation of the basement faults by lower-crust fluid during the 2017 Changdao earthquake swarm in Eastern China
Source: Research Square preprint supplement (doi:10.21203/rs.3.rs-6432511/v1), 2025-05-13
Supplement: Supplementary file 1 [file df6cafd3b50204725fb7b1ed.pdf]

# 1 Supplementary Material

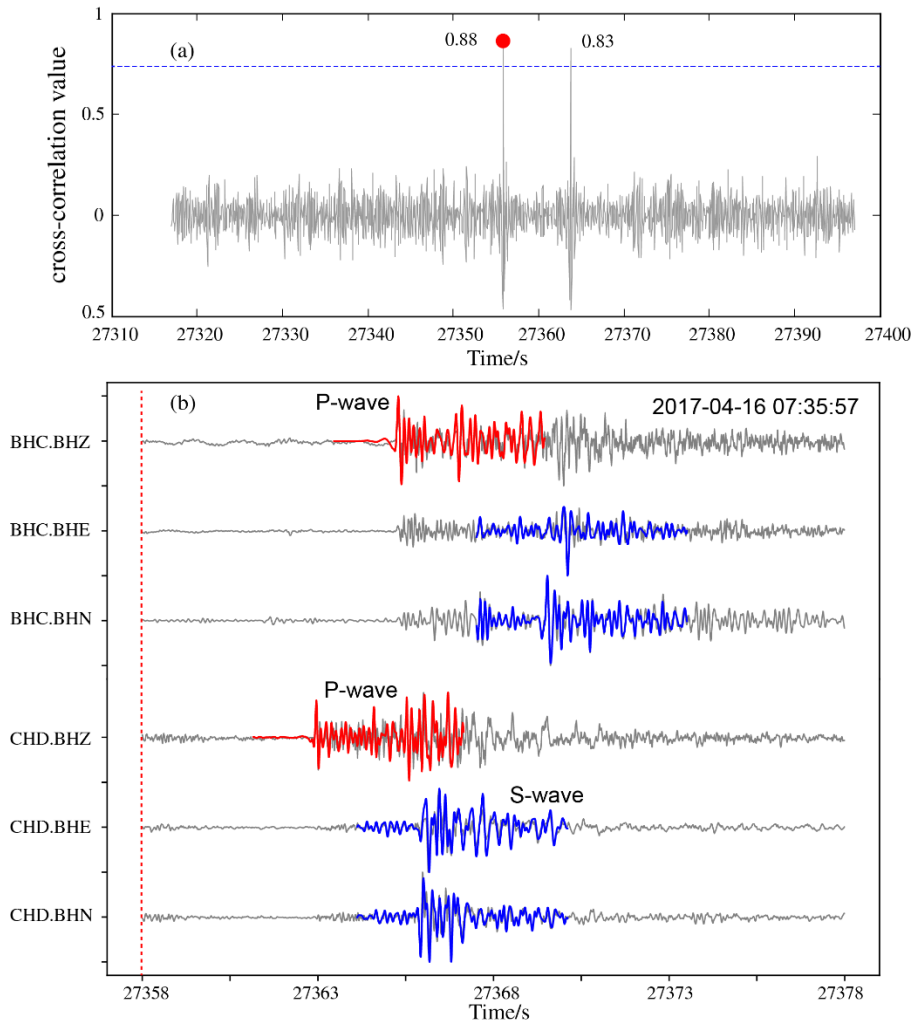

2  
3 **Figure S1.** (a) Mean CC after migration of time (blue dotted line represents the threshold; red  
4 dot represents detected events). The horizontal axis is sampling point corresponding to time,  
5 sampling rate is 100. (b) Example of a detected  $M_L 2.6$  event at 07:35:57 on 16 April 2017 (gray  
6 waveform). It is detected by the template from  $M_L 3.0$  event at 09:40:46 on 15 April 2017, its P-  
7 wave is the red line and S-wave is the blue line. Red dotted line is the origin time of earthquake  
8 corresponding to the horizontal ordinate of red dot in Figure 2a.

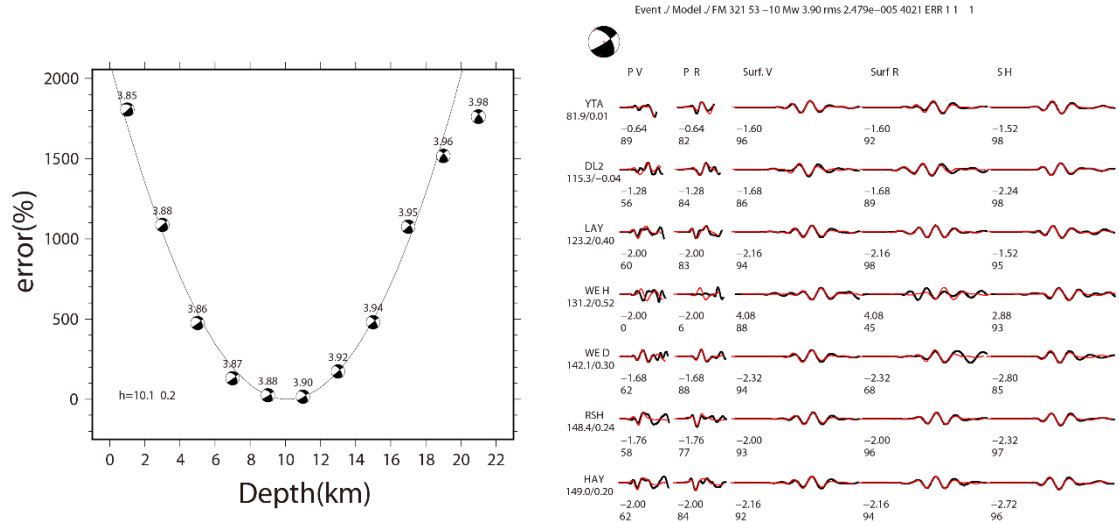

**Figure S2.** Example of calculating focal mechanism using CAP method. The earthquake was 2017-03-21 00:54:40  $M_L 4.1$ , the corresponding focal mechanism solution was strike-slip with positive fault component; the right figure was the fitting diagram of body wave and surface wave of each station, which shows that the fitting was good.

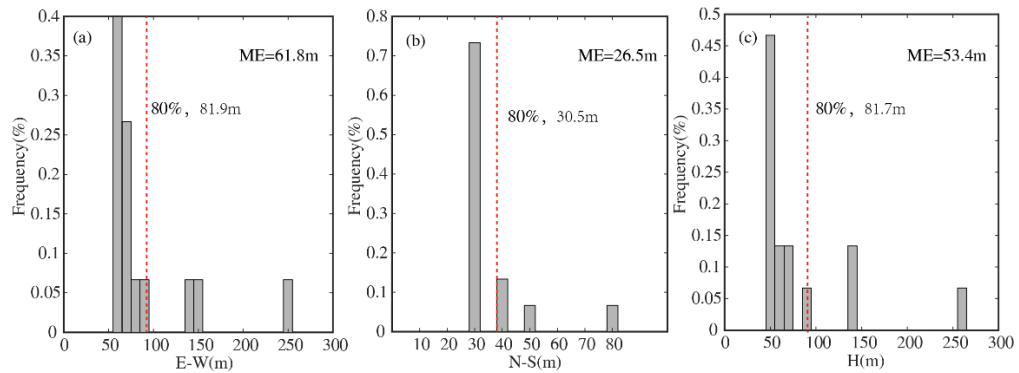

**Figure S3.** The errors of all earthquakes in the horizontal and vertical directions. ME indicated the median value of earthquakes in the direction. The red line mark 80% errors. We selected 90 events on February 14, 2017 (with magnitude range of 0.5-2.8) based on singular-value decomposition (SVD) option in the hypoDD. The median location errors and 80% errors of horizontal and vertical directions were also less than 100 m in the horizontal and depth directions. These values suggested that the horizontal separation of  $\sim 0.5$  km for parallel sections were likely not due to location uncertainties.

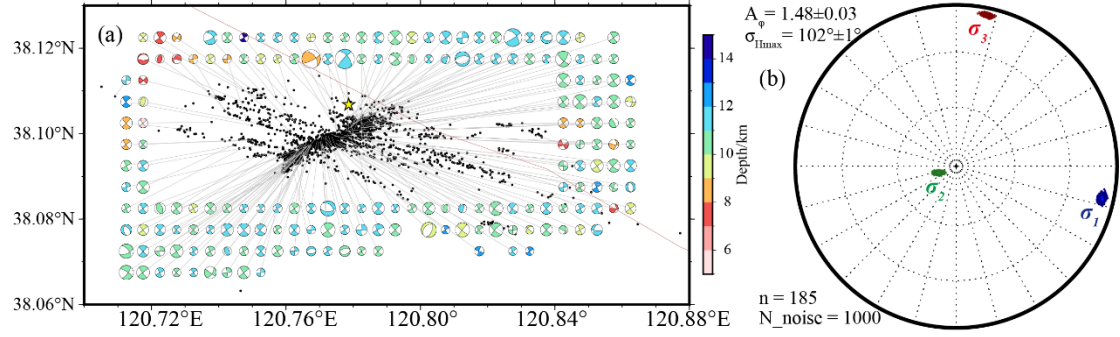

**Figure S4.** Focal mechanisms of the earthquakes with magnitude larger than 2 and the stress inversion result. The color in (a) indicated the depth. The stress tensor was inverted using the iterative stress inversion [Vavryčuk, 2014; Levandowski et al., 2018].  $A_\varphi$  was the stress ratio and  $\sigma_{Hmax}$  was the horizontal principal stress orientations,  $n$  was the counts of the earthquakes and repeated 1000 times jackknife Stress inversion.

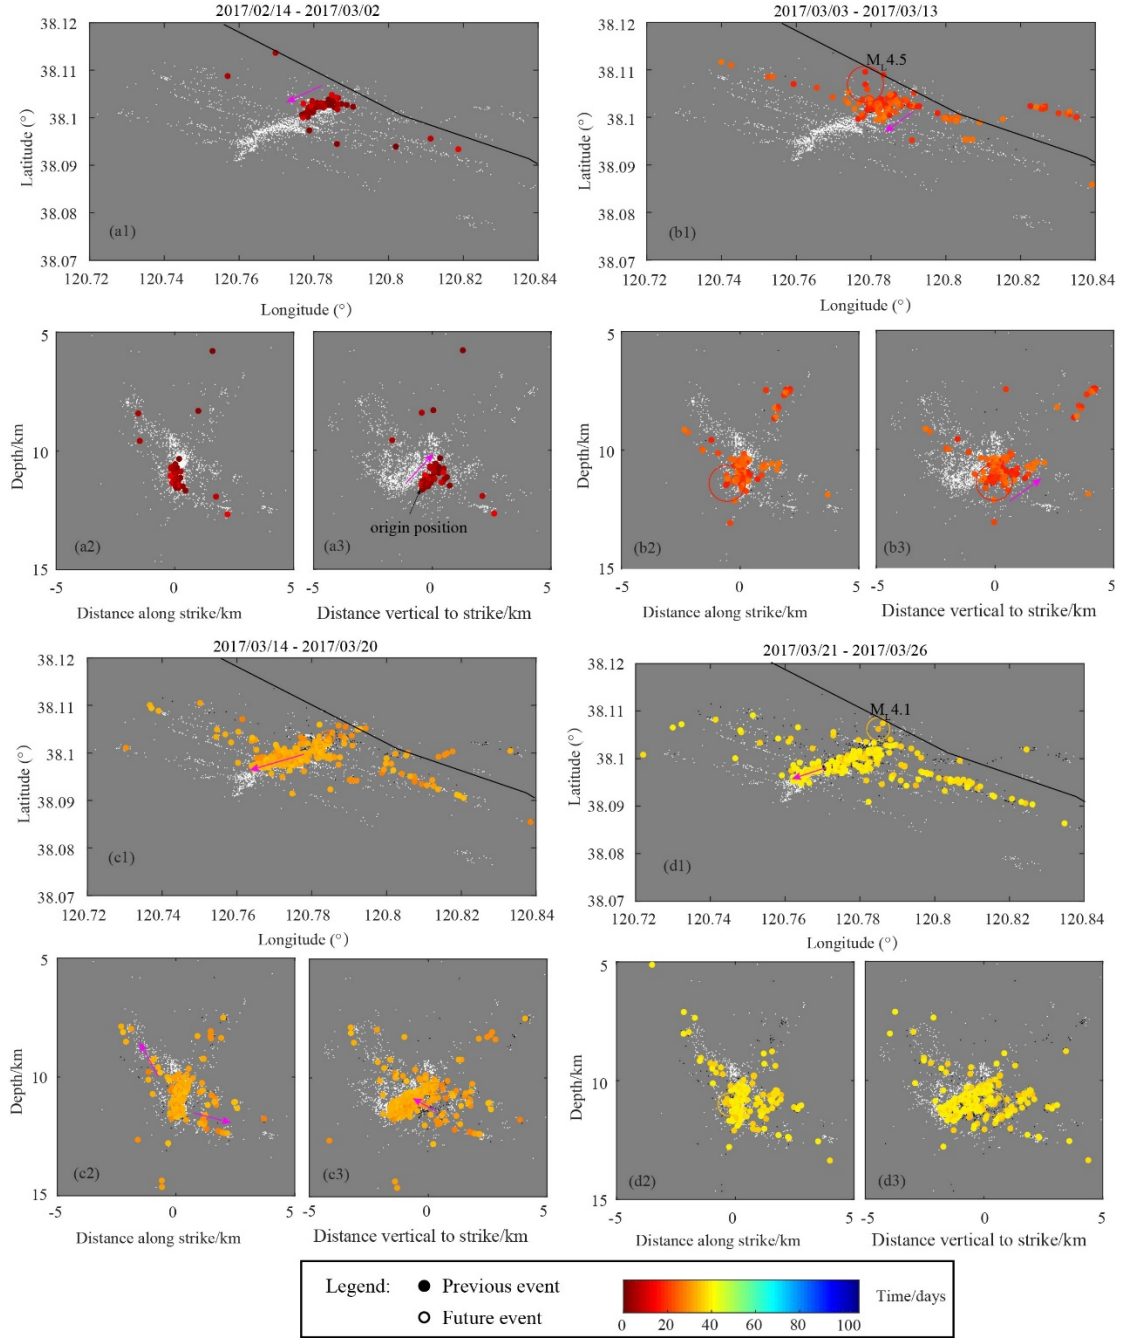

**Figure S5.** Space-time progression of swarm earthquakes. Each frame shows a map view on top and two cross-sectional views on the bottom. The color indicates the occurrence time, as shown in Figure 3. The hollow circles indicate the rupture areas of earthquake greater than 3 based on an assumption of 3 MPa stress drop. Black points showed events occurring before the frame, while those occurring afterward were white. The purple arrows indicated the expand direction.

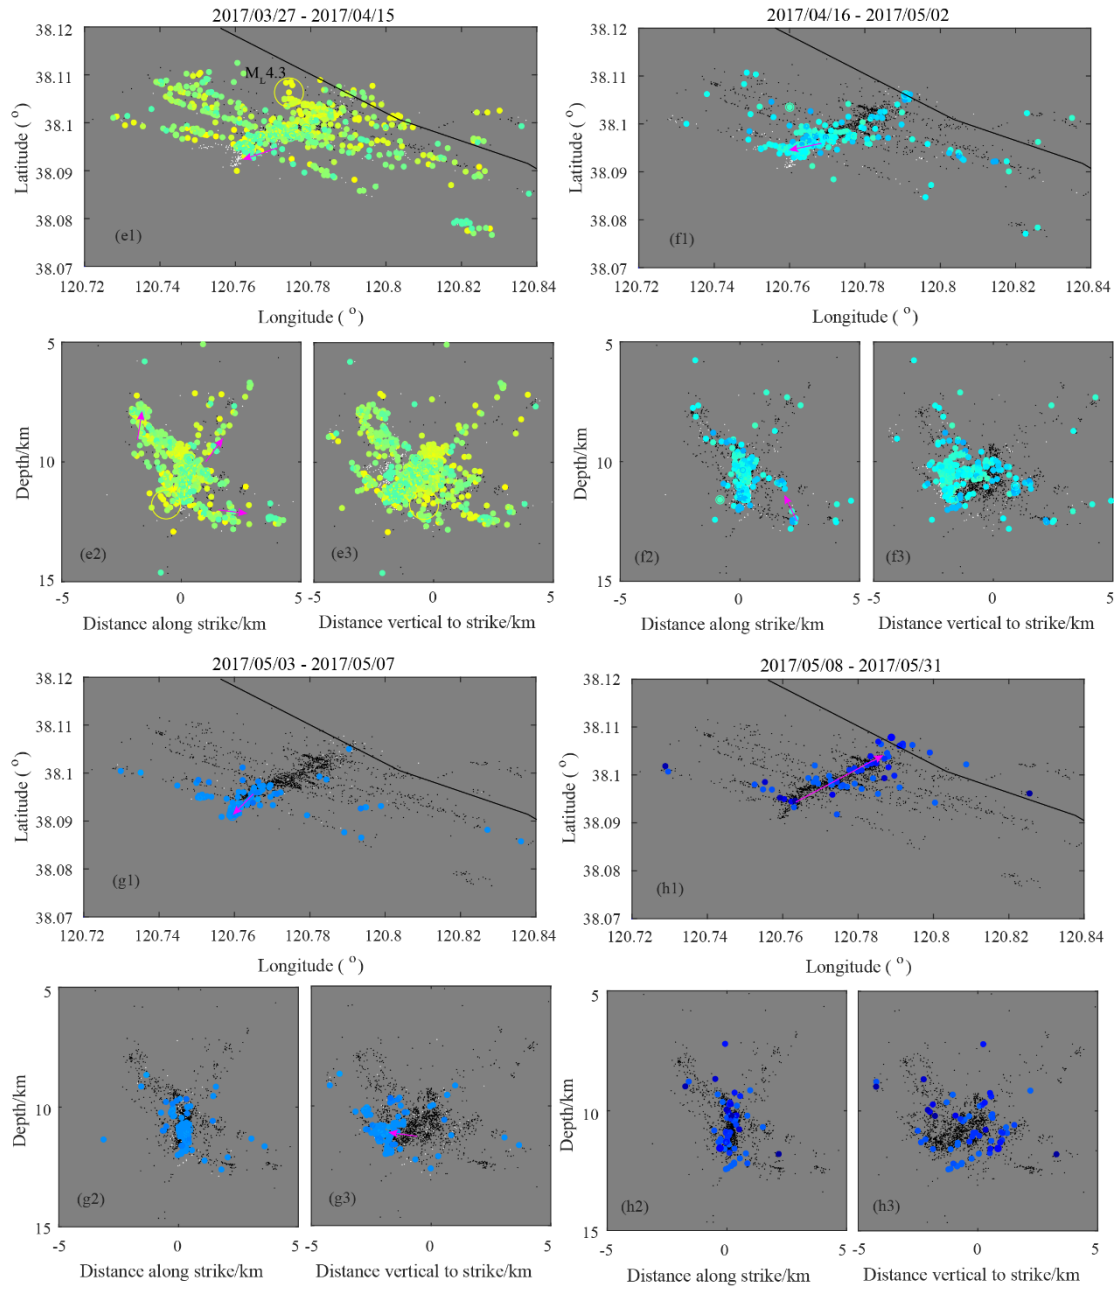

**Figure S6.** Space-time progression of swarm earthquakes(continue).
